# Supplementary material
Source: Research Square preprint supplement (doi:10.21203/rs.3.rs-9106024/v1)
Supplement: Supplementary file 1 [file c347d47281f87717e6ca730e.docx]

Supplementary material

|  | Development metrics | | | | | Final metrics | | | | | |
| --- | --- | --- | --- | --- | --- | --- | --- | --- | --- | --- | --- |
|  | Returned | | Unreturned | | Development score | Returned | | | Unreturned | | |
|  | True positives | True negatives | True positives | True negatives | F1 | Precision | Recall | F1 | Precision | Recall |
| Quality |  |  |  |  |  |  |  |  |  |  |  |
| Size | 0,98 | 0,98 | 1 | 0,94 | 0,98 | 0,969 | 0,94 | 1 | 1 | 1 | 1 |
| Durability in laundering | 1 | 1 | 1 | 0,929 | 0,98 | 0,889 | 0,8 | 1 | 0,958 | 0,92 | 1 |
| Durability in manufacturing | 1 | 0,94 | 1 | 0,92 | 0,97 | 0,805 | 0,673 | 1 | 0,847 | 0,735 | 1 |
| Functionality |  |  |  |  |  |  |  |  |  |  |  |
| Suitability | 0,98 | 0,97 | 0,94 | 1 | 0,97 | 0,97 | 0,98 | 0,961 | 0,968 | 0,958 | 0,979 |
| Aesthetics |  |  |  |  |  |  |  |  |  |  |  |
| Style combination | 1 | 1 | 0,96 | 1 | 0,99 | 0,99 | 0,98 | 1 | 1 | 1 | 1 |
| Colour | 1 | 0,98 | 0,98 | 1 | 0,99 | 0,969 | 0,94 | 1 | 1 | 1 | 1 |
| Physical reaction | 0,98 | 0,98 | 1 | 0,94 | 0,98 | 0,969 | 0,94 | 1 | 0,99 | 0,98 | 1 |
| Match with photo | 1 | 0,76 | 1 | 0,88 | 0,91 | 0,958 | 0,92 | 1 | 0,913 | 0,84 | 1 |
| Value |  |  |  |  |  |  |  |  |  |  |  |
| Perceived value | 1 | 0,98 | 0,98 | 1 | 0,99 | 1 | 1 | 1 | 0,99 | 0,98 | 1 |

Table 1 – Development and final metrics of the SACL

- Precision is defined as the number of true positives divided by the sum of true positives and false positives.
- Recall is defined as the number of true positives divided by the sum of true positives and false negatives.
- F1 is the harmonic mean of precision and recall. The highest possible value of an F1 score is 1.0, the lowest is 0.
